# Supplementary material for: Bridging the Gap between Academia and Society: Research, Training and Strategic Alliances for Sustainable Development
Source: Preprints.org preprint supplement (doi:10.20944/preprints202403.0894.v1), 2024-03-15

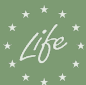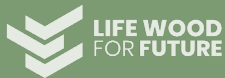

Con la contribución del instrumento financiero LIFE de la Unión Europea LIFE20 CCM/ES/001656

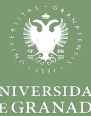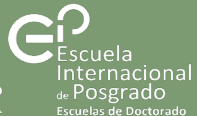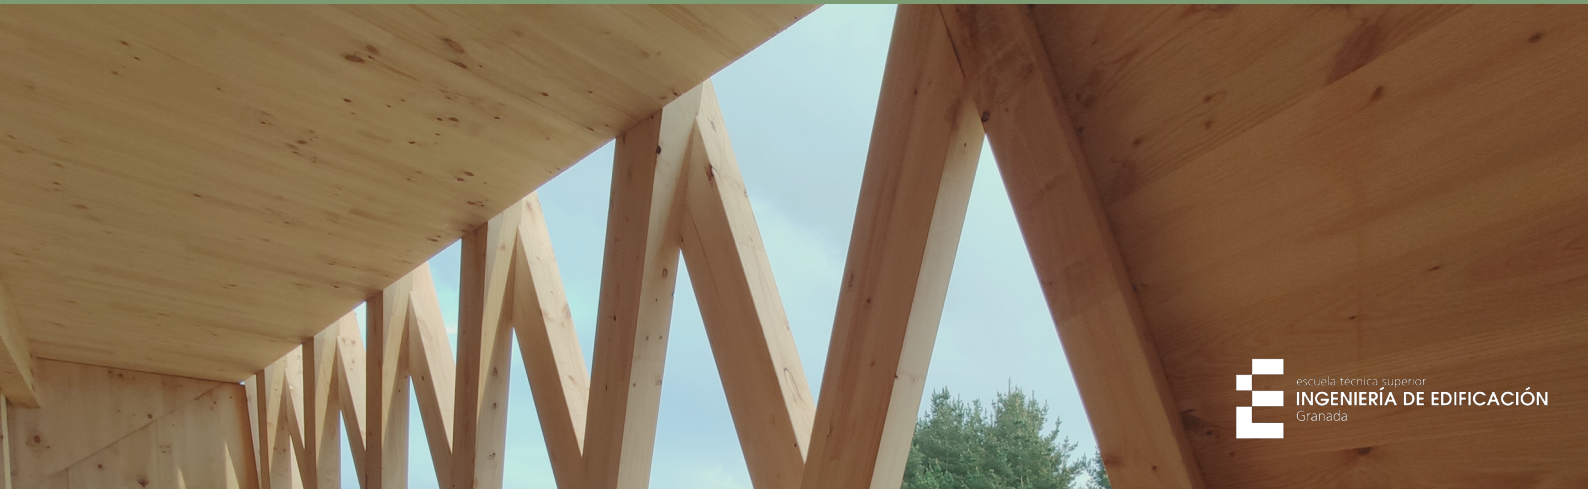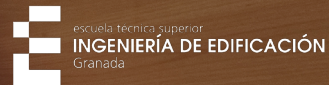

# DIPLOMA en CÁLCULO DE ESTRUCTURAS DE MADERA APLICADA A PROYECTOS

2ª edición: DE MARZO A ABRIL DE 2023

Lugar: GRANADA

PATROCINADO POR

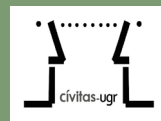

## PRESENTACIÓN

El Diploma pretende capacitar a los alumnos en la sostenibilidad y en el cálculo de estructuras de madera, a través de una formación enfocada a proyectos en donde se presenta la teoría al tiempo que se desarrollan casos prácticos (forjados, estructuras en barras, estructuras de madera contralaminada y estructuras de entramado ligero) utilizando un software comercial. El diploma incluye también ensayos de laboratorio y aborda importantes aspectos sobre su sostenibilidad.

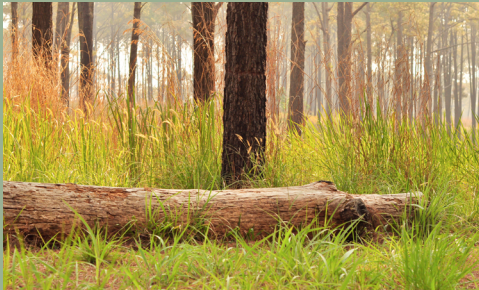

## MOTIVACIÓN

Actualmente el uso de la madera estructural está creciendo considerablemente en España y Europa, fruto de los nuevos productos industrializados (madera técnica), los beneficios ambientales que supone su utilización y la consecución de los ODS. Por otro lado, en las titulaciones oficiales de grado y máster, no se profundiza lo suficiente para enfrentarse a proyectos completos de cálculo. El diploma propuesto pretende cubrir esta falta formativa, tanto en estudiantes como en profesionales.

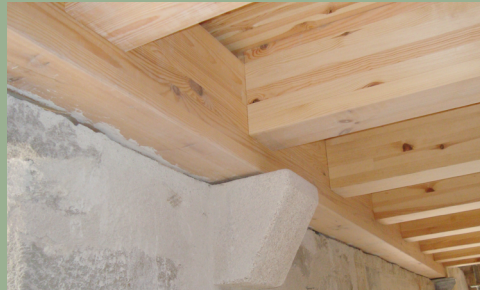

## EL ALUMNO APRENDERÁ

1. Integrar conceptos de sostenibilidad en el ciclo de vida de la madera.
2. Los principios básicos de la madera como material.
3. Clasificar estructuralmente la madera mediante normativa.
4. Las bases del proyecto sismorresistente en estructuras de madera.
5. Las bases de cálculo de estructuras de madera.
6. Calcular estructuras de madera mediante el software de simulación numérica "RFEM Dlubal".

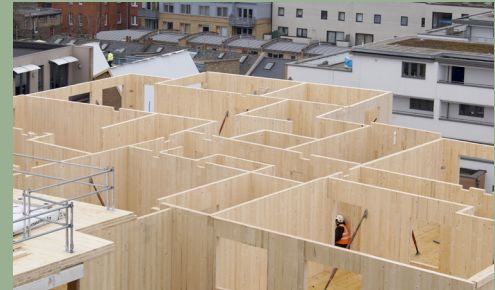

## REQUISITOS DE ADMISIÓN

1. Alumnos del último curso de los grados de Ingeniería de Edificación, Arquitectura, Ingeniería Civil, Ingeniería de Montes, Ingeniería Forestal o Ingeniería Industrial.
2. Alumnos de Máster relacionados con dichos grados.
3. Profesionales graduados o másteres de las titulaciones anteriores.

## NÚMERO MÁXIMO DE PLAZAS

20

## TIPO DE ENSEÑANZA

60 horas presenciales + 25 horas online

## LUGAR DE IMPARTICIÓN

ETS de Ingeniería de Edificación (Granada)

## NÚMERO DE CRÉDITOS ECTS

8.50

## EVALUACIÓN

Resolución de casos prácticos en clase y trabajo autónomo del alumno

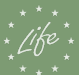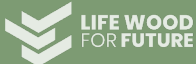

Con la contribución del instrumento financiero LIFE de la Unión Europea LIFE20-CCM/ES/001656

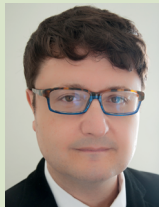

## ANTOLINO GALLEGO

Coordinador del Grupo de Investigación y Desarrollo en Ingeniería de Edificación y Catedrático de la ETS de Ingeniería de Edificación de la Universidad de Granada (UGR). Sus áreas principales de trabajo son el refuerzo de estructuras de madera con materiales compuestos, ensayos no destructivos en madera, y desarrollo de productos de madera técnica.

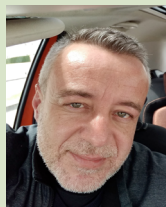

## MANUEL GUAITA

Catedrático de la Universidad de Santiago de Compostela (USC). Director de la Plataforma de Ingeniería de la Madera PEMADE. Su ámbito de investigación se centra en la Madera para usos estructurales habiendo sido director del Máster en Ingeniería de la Madera Estructural de la USC.

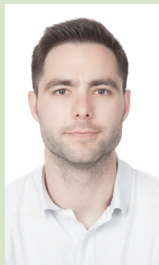

## FRANCISCO RESCALVO

Máster en Estructuras. Doctor en Ingeniería Civil y contratado posdoctoral en la Universidad de Granada, su área de conocimiento se centra en el refuerzo de estructuras de madera con materiales compuestos, desarrollo de madera técnica, caracterización mecánica de la madera en todas sus fases y ensayos no destructivos.

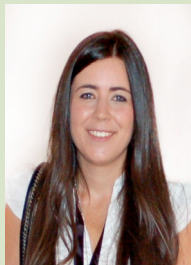

## ELISABET SUAREZ

Profesora Ayudante Doctor en el Departamento de Construcciones Arquitectónicas de la Universidad de Granada, con experiencia en ensayos no destructivos y caracterización mecánica de la madera, tanto en árbol como en troza y tabla.

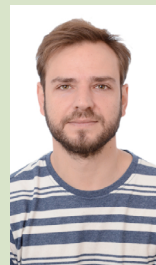

## LEANDRO MORILLAS

Profesor Titular en el Departamento de Mecánica de Estructuras e Ingeniería Hidráulica de la Universidad de Granada, con experiencia en metodologías y tecnologías de proyecto sismorresistente, con especial énfasis en estructuras de madera.

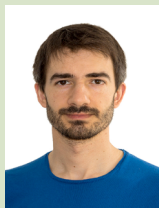

## JOSE ANTONIO LORENZANA

Máster en Ingeniería de la Madera Estructural de la USC, con experiencia profesional en el ámbito del diseño, cálculo y simulación numérica de estructuras de madera para la validación de modelos experimentales, y desarrollo de modelos para la optimización estructural. Investigador en PEMADE (Plataforma de Ingeniería de la Madera).

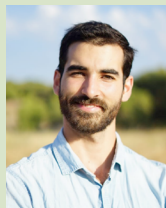

## FERNANDO MORALES DE RUEDA

Máster en Planificación, Gobernanza y Liderazgo territorial. Investigador del Grupo de Investigación de Restauración de Ecosistemas y Agrosistemas del Departamento de Ecología (UGR). Con experiencia profesional en el ámbito de la sostenibilidad territorial y sus implicaciones con el funcionamiento de los ecosistemas forestales.

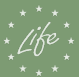

## PROGRAMA GENERAL DEL DIPLOMA

| M_1                                                                                                                                                                                                                                                       | M_2                                                                                                                                            | M_3                                                                                                | M_4                                                                                                                              | M_5                                                                               | M_6                                                                                                   | M_7                                                                                       |
|-----------------------------------------------------------------------------------------------------------------------------------------------------------------------------------------------------------------------------------------------------------|------------------------------------------------------------------------------------------------------------------------------------------------|----------------------------------------------------------------------------------------------------|----------------------------------------------------------------------------------------------------------------------------------|-----------------------------------------------------------------------------------|-------------------------------------------------------------------------------------------------------|-------------------------------------------------------------------------------------------|
| SOSTENIBILIDAD                                                                                                                                                                                                                                            | MATERIAL Y ENSAYOS                                                                                                                             | BASES DE CÁLCULO Y FORJADOS                                                                        | CERCHAS Y NAVES                                                                                                                  | CLT Y ENTRAMADO LIGERO                                                            | COMPORTAMIENT. SÍSMICO                                                                                | VISITAS                                                                                   |
| <p>Sostenibilidad en el sector de la madera</p> <p>Sociedad y marco de acción global para la sostenibilidad</p> <p>Ecología y servicios ecosistémicos de la producción de madera</p> <p>Economía y gestión sostenible de la madera</p> <p><b>10 h</b></p> | <p>Propiedades de la madera</p> <p>Clasificación de la madera</p> <p>Ensayo de laboratorio</p> <p>Acústica de la madera</p> <p><b>20 h</b></p> | <p>Introducción teórica y del software de cálculo</p> <p>Forjados de madera</p> <p><b>15 h</b></p> | <p>Estructuras de barras</p> <p>Cercha española</p> <p>Análisis por segundo orden</p> <p>Nave de gran luz</p> <p><b>20 h</b></p> | <p>Estructura de CLT</p> <p>Estructura de entramado ligero</p> <p><b>15 h</b></p> | <p>Proyecto sismorresistente en madera</p> <p>Proyecto por capacidad de uniones</p> <p><b>5 h</b></p> | <p>Visita a obra</p> <p>Visita a aserradero y monte</p> <p>Opcional</p> <p><b>0 h</b></p> |

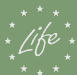

## CALENDARIO

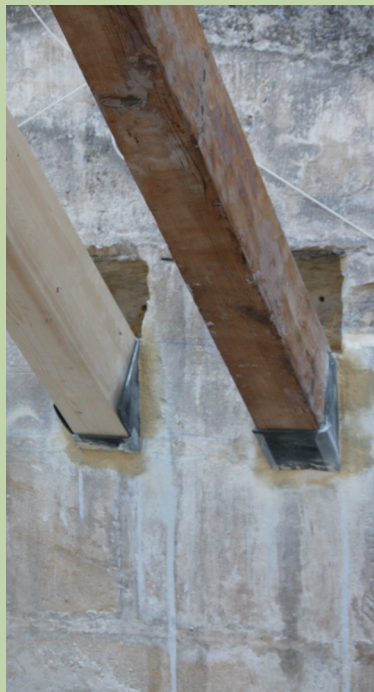

| MÓDULO     |     |           |          | HORARIO MAÑANA         |       | HORARIO TARDE          |       |
|------------|-----|-----------|----------|------------------------|-------|------------------------|-------|
|            |     |           |          | Hora inicio_Hora final |       | Hora inicio_Hora final |       |
| ONLINE     | M_1 | Miércoles | 08-marzo |                        |       | 15:00                  | 20:30 |
| ONLINE     | M_1 | Jueves    | 09-marzo |                        |       | 15:00                  | 20:30 |
| ONLINE     | M_2 | Viernes   | 10-marzo |                        |       | 15:00                  | 20:30 |
| ONLINE     | M_2 | Sábado    | 11-marzo | 8:30                   | 14:00 |                        |       |
| PRESENCIAL | M_2 | Lunes     | 13-marzo |                        |       | 15:00                  | 20:30 |
| PRESENCIAL | M_3 | Martes    | 14-marzo |                        |       | 15:00                  | 20:30 |
| PRESENCIAL | M_3 | Miércoles | 15-marzo |                        |       | 15:00                  | 20:30 |
| PRESENCIAL | M_3 | Jueves    | 16-marzo |                        |       | 15:00                  | 20:30 |
| PRESENCIAL | M_4 | Viernes   | 17-marzo |                        |       | 15:00                  | 20:30 |
| PRESENCIAL | M_4 | Sábado    | 18-marzo | 8:30                   | 14:00 |                        |       |
| PRESENCIAL | M_4 | Lunes     | 27-marzo |                        |       | 15:00                  | 20:30 |
| PRESENCIAL | M_4 | Martes    | 28-marzo |                        |       | 15:00                  | 20:30 |
| PRESENCIAL | M_5 | Miércoles | 29-marzo |                        |       | 15:00                  | 20:30 |
| PRESENCIAL | M_5 | Jueves    | 30-marzo |                        |       | 15:00                  | 20:30 |
| PRESENCIAL | M_5 | Viernes   | 31-marzo |                        |       | 15:00                  | 20:30 |
| ONLINE     | M_6 | Martes    | 11-abril |                        |       | 15:00                  | 20:30 |
| ONLINE     | M_2 | Miércoles | 12-abril |                        |       | 15:00                  | 20:30 |

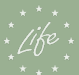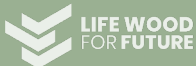

Con la contribución del instrumento financiero LIFE de la Unión Europea LIFE20-CCM/ES/001656

## PRECIO

430 €

## INCLUYE

Acceso a las clases\_Usa gratis el software Dlubal durante 1 año\_Título oficial expedido por UGR

## MATRÍCULA

Se realiza a través de la **Escuela Internacional de Posgrado de la UGR**

## DOCUMENTACIÓN NECESARIA

Fotocopia del DNI  
Fotocopia del título de acceso

## FECHA DE MATRICULACIÓN

Hasta el 22 de febrero

## BECAS

1 beca al 100 % y 1 beca al 70 %

## INFORMACIÓN Y CONTACTO

[adime@ugr.es](mailto:adime@ugr.es)

[idie.ugr.es](http://idie.ugr.es)

Teléfono: 958249508

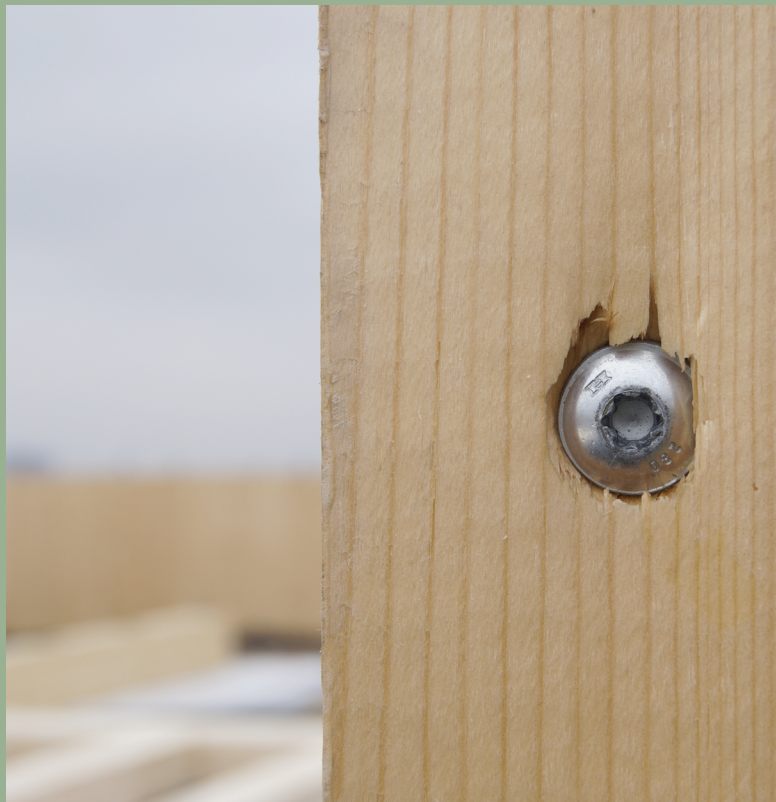

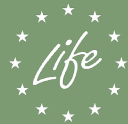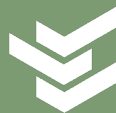

**LIFE WOOD  
FOR FUTURE**

Con la contribución del instrumento financiero LIFE de la  
Unión Europea LIFE20 CCM/ES/001656

## COLABORADORES

**T** **TIMBERTECH**  
BUILDINGS

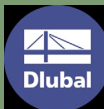

Supplement: Supplementary file 1 [file supplementary:Supplementary%20Material%202%20Post%20grad%20Diploma.pdf]
